# Supplementary material
Source: PubMed Central journal article supplement (PMC4707756)
Supplement: rspb20152064supp2.pdf [file rspb20152064supp2.pdf]

**S2: Terminal frequency differences between jammed and jamming bats.** Relative terminal frequency between jamming and jammed bats when jammed by conspecifics for call durations of 2-4ms.

| <b>Bat</b> | <b>Terminal frequency (kHz) (mean±sd)</b> | <b>Jammed by Bat</b> | <b>Average frequency of jamming bat compared to jammed bat</b> |
|------------|-------------------------------------------|----------------------|----------------------------------------------------------------|
| 1          | 36±0.9                                    | 4                    | Higher                                                         |
| 2          | 35.1±0.7                                  | 3                    | Equal                                                          |
| 3          | 35.2±0.6                                  | 4                    | Higher                                                         |
| 4          | 37.4±0.4                                  | 3                    | Lower                                                          |
