# Supplementary material
Source: PubMed Central journal article supplement (PMC4707756)
Supplement: rspb20152064supp3.pdf [file rspb20152064supp3.pdf]

**S3: Jamming treatments table.** The different treatments and the jamming sequences used in them.

Bats landed between 10-23 times at each session.

| <b>Treatment</b>                 | <b>Jamming signal</b>                                                                                                                               | <b>Description and purpose</b>                                                                                             | <b>No. Of Sessions per bat</b> |
|----------------------------------|-----------------------------------------------------------------------------------------------------------------------------------------------------|----------------------------------------------------------------------------------------------------------------------------|--------------------------------|
| None                             | None used                                                                                                                                           | Determine baseline                                                                                                         | 3                              |
| Jammed by self - low duty-cycle  | 30-50% (effective) duty-cycle sequence of calls of the same individual.                                                                             | Produce maximum spectral jamming in low duty-cycle.                                                                        | 2                              |
| Jammed by self - high duty-cycle | 100% (effective) duty-cycle sequence of calls of the same individual.                                                                               | Produce maximum spectral jamming in high duty-cycle.                                                                       | 2                              |
| Jammed by multiple conspecifics  | 30-50% (effective) duty-cycle sequence of calls of the other three individuals.                                                                     | Simulate natural scenario of group foraging                                                                                | 1                              |
| Jammed by one conspecific        | 30-50% (effective) duty-cycle sequence of calls of the conspecific with the fundamental frequency that was most distant from the jammed individual. | Simulate a semi-natural scenario of group foraging, with least possible spectral overlap.                                  | 2                              |
| Reversed signal                  | 30-50% (effective) duty-cycle sequence of calls of the same individual. Each call was reversed along the time axis.                                 | Produce maximum spectral jamming without calls being considered as conspecifics – with no difficulty of temporal matching. | 1                              |
| Clutter - none                   | None used                                                                                                                                           | Determine baseline                                                                                                         | 2                              |
| Clutter - jammed by self         | 30-50% (effective) duty-cycle sequence of calls of the same individual with strings.                                                                | Produce maximum spectral jamming in low duty-cycle.                                                                        | 2                              |

Jamming treatments table. The different treatments and the jamming sequences used in them.

Bats landed between 10-23 times at each session.
